# Supplementary material for: Methoxy substituents activated carbazole-based boron dimesityl TADF emitters
Source: Royal Society of Chemistry journal article supplement (doi:10.1039/c9tc07020f), 2020-01-01
Supplement: c9tc07020f1.pdf [file c9tc07020f1.pdf]

## Supporting Information

### Methoxy Substituents Activated Carbazole-Based Boron Dimesityl TADF Emitters

Paramaguru Ganesan,<sup>a,†</sup> Deng-Gao Chen,<sup>b,†</sup> Wen-Cheng Chen,<sup>c</sup> Jia-An Lin,<sup>b</sup> Chun-Ying Huang,<sup>b</sup>  
Meng-Chi Chen,<sup>b</sup> Chun-Sing Lee,<sup>\*,c</sup> Pi-Tai Chou,<sup>\*,b</sup> and Yun Chi,<sup>\*,a,d</sup>

<sup>a</sup> Department of Chemistry and Frontier Research Center on Fundamental and Applied Sciences of Matters, National Tsing Hua University, Hsinchu 30013, Taiwan

<sup>b</sup> Department of Chemistry, National Taiwan University, Taipei 10617, Taiwan

<sup>c</sup> Center of Super-Diamond and Advanced Films (COSDAF) and Department of Chemistry, City University of Hong Kong, Hong Kong SAR.

<sup>d</sup> Department of Chemistry and Department of Materials Science and Engineering, City University of Hong Kong, Hong Kong SAR

†These authors contributed equally

---

### Corresponding Author

Chun-Sing Lee, E-mail: [apcslee@cityu.edu.hk](mailto:apcslee@cityu.edu.hk)

Pi-Tai Chou, E-mail: [chop@ntu.edu.tw](mailto:chop@ntu.edu.tw)

Yun Chi, E-mail: [yunchi@cityu.edu.hk](mailto:yunchi@cityu.edu.hk)

**Keywords:** boron, carbazole, charge transfer, TADF, OLEDs

## Table of Contents

|                                                                                                                    |        |
|--------------------------------------------------------------------------------------------------------------------|--------|
| 1. <i>Experimental Section</i> .....                                                                               | S3-4   |
| 2. <i>Experimental procedures</i> .....                                                                            | S5-11  |
| <b>Scheme S1.</b> Synthetic routes of (A) Cz-1 and Cz-2 and (B) Cz-3 .....                                         | S10    |
| <b>Scheme S2.</b> Synthetic routes of <b>CzBM-1, 2 and 3</b> and <b>CzPBM-2 and 3</b> .....                        | S10    |
| <b>Figure S1.</b> <sup>1</sup> H NMR of <b>CzBM-3</b> and <b>CzPBM-3</b> . .....                                   | S11    |
| 3. <i>Thermogravimetric analysis (TGA) Methods</i> .....                                                           | S12    |
| <b>Figure S2.</b> TGA (left) and DSC (right) data of <b>CzBM-1 to 3</b> , <b>CPBM-2</b> and <b>3</b> .....         | S12    |
| <b>Table S1.</b> Thermal analysis of <b>CzBM-1 to 3</b> , <b>CPBM-2</b> and <b>3</b> .....                         | S12    |
| 4. <i>Photophysical properties</i> .....                                                                           | S13-16 |
| <b>Figure S3.</b> The time resolved PL spectra of the titled molecules in CH <sub>2</sub> Cl <sub>2</sub> .....    | S13    |
| <b>Figure S4.</b> Transient photoluminescence characteristics of the <b>CzBM-1</b> .....                           | S14    |
| <b>Figure S5.</b> Transient photoluminescence characteristics of the <b>CzBM-2</b> .....                           | S14    |
| <b>Figure S6.</b> Transient photoluminescence characteristics of <b>CzBM-3</b> .....                               | S14    |
| <b>Figure S7.</b> Transient photoluminescence characteristics of <b>CzPBM-2</b> and <b>3</b> .....                 | S15    |
| <b>Figure S8.</b> Transient photoluminescence characteristics of neat films .....                                  | S15    |
| <b>Table S2.</b> Photophysical properties of the studied boron compounds. ....                                     | S16    |
| 5. <i>Cyclic Voltammograms studies</i> .....                                                                       | S17    |
| <b>Figure S9.</b> Cyclic voltammograms of Cz-2 and Cz-3, <b>CzBM-1 to 3</b> , and <b>CPBM-2</b> and <b>3</b> ..... | S17    |
| <b>Table S3.</b> Electrochemical properties and calculated bandgaps of the TADF molecules.....                     | S17    |
| 6. <i>Computational approaches</i> .....                                                                           | S18-21 |
| <b>Table S4 to S5</b> Calculated wavelength and orbital transition analyses for <b>CzBM-1</b> .....                | S18    |
| <b>Table S6 to S7</b> Calculated wavelength and orbital transition analyses for <b>CzBM-2</b> .....                | S18    |
| <b>Table S8 to S9</b> Calculated wavelength and orbital transition analyses for <b>CzBM-3</b> .....                | S19    |
| <b>Table S10</b> Calculated wavelength and orbital transition analyses for <b>CzPBM-0</b> .....                    | S19    |
| <b>Table S11 to S12</b> Calculated wavelength and orbital transition analyses for <b>CzPBM-2</b> .....             | S20    |
| <b>Table S13 to S14</b> Calculated wavelength and orbital transition analyses for <b>CzPBM-3</b> .....             | S21    |
| <b>Table S15.</b> Calculated orbital energy levels' for the titled molecules.....                                  | S21    |

## 1. Experimental Section

**General Procedures.** Solvents were dried over appropriate drying agents and commercially available reagents were used without further purification. All reactions were conducted under nitrogen atmosphere unless otherwise noted. All reactions were monitored by pre-coated TLC plates (0.20 mm with fluorescent indicator F<sub>254</sub>). Mass spectra were obtained on a JEOL SX-102A instrument operating in electron impact (EI) or fast atom bombardment (FAB) mode. The <sup>1</sup>H, and <sup>13</sup>C NMR spectra were recorded on a Varian Mercury-400 or an INOVA-500 instrument. Elemental analysis was carried out with a Heraeus CHN-O-Rapid Elemental Analyzer. Thermal analysis was performed using a Seiko Instrument TG/DTA 320 thermogravimetric analyzer at a heating rate of 10 °C/min and under nitrogen. Differential scanning calorimeter (DSC) was conducted using a Seiko Instrument DSC220C, with a heating and cooling rate of 10 °C /min.

**Photophysical Characterization:** Steady-state absorption spectra were recorded using a Hitachi U-3310 spectrophotometer, and emission spectra were obtained using an Edinburgh FS920 fluorimeter. Time-resolved PL (PL decay curves) was measured by monitoring the decay of the intensity at the PL peak wavelength using the time-correlated single-photon counting (TCSPC) technique and nanosecond pulsed light excitation from a pulsed hydrogen-filled lamp (355 nm), with a fluorescence lifetime system (Edinburgh FLS920).

**Single Crystal X-Ray Diffraction Studies:** Single crystal X-ray diffraction data were measured on a Bruker SMART Apex CCD diffractometer using Mo radiation ( $\lambda = 0.71073 \text{ \AA}$ ). The data collection was executed using the *SMART* program. Cell refinement and data reduction were performed with the *SAINTE* program. An empirical absorption was applied based on the symmetry-equivalent reflections and the *SADABS* program. The structures were solved using the *SHELXS-97* program and refined using *SHELXL-97* program by full-matrix least squares on F<sup>2</sup> values. CCDC-1900690, 1900691, and 1900692 contains the supplementary crystallographic data of **CzBM-1**, **CzBM-3** and **CzPBM-3** respectively. The data can be obtained free of charge from the Cambridge Crystallographic Data Centre via <http://www.ccdc.cam.ac.uk>

**Computational Methods:** The geometries of the ground state for the titled compounds were optimized by the density functional theory (DFT) method. The electronically excited-state structures with relevant photophysical properties were calculated by the time-dependent density functional theory (TD-DFT) method with a M062X hybrid function in combination with a polarizable continuum model (PCM). The 6-31+G(d,p) basis set was employed for all atoms. All theoretical calculations were performed using the Gaussian 09 program.

**OLED Fabricated Methods:** OLEDs were fabricated on cleaned ITO-coated glass substrates as anode with a sheet resistance of  $15 \Omega \text{ square}^{-1}$ . Before use, ITO substrates were swabbed with diluted Decon-90 solution. After 20-min ultrasonic bath in acetone and deionized water respectively, and the substrates were then rinsed with isopropanol. Dry nitrogen flow was used to remove the surface on the surface, and then the substrates were stored in an oven at  $100 \text{ }^\circ\text{C}$ . After a 20-minute UV/O<sub>3</sub> cleaning, the ITO substrates were transfer into a vacuum chamber ( $\sim 10^{-6}$  torr) for material deposition. Electrical characteristics of devices were measured by a Keithley 237 power source, while electroluminescence properties were recorded on a Spectrascan PR650 photometer. OLED measurements were conducted under ambient condition without any encapsulation.

## 2. Experimental procedures

Synthesis of **5**: 2-bromoaniline (2.00 g, 11.63 mmol), 2-methoxyiodobenzene (2.99 g, 12.78 mmol), Pd<sub>2</sub>(dba)<sub>3</sub> (0.11 g, 0.12 mmol), bis(diphenylphosphino)ferrocene (0.13 g, 0.23 mmol) and <sup>t</sup>BuONa (1.68 g, 17.44 mmol) were dissolved in toluene (80 mL) and then the solution was heated to reflux. After being stirred for 24 hours, the mixture was cooled to room temperature and partitioned between water and ethyl acetate. The organic layer was separated and the aqueous layer was extracted with ethyl acetate (2 × 50 mL). The combined organic layers were washed with brine, dried over Na<sub>2</sub>SO<sub>4</sub>, and concentrated to dryness. The resulting residue was purified by silica gel column chromatography, eluting with hexane and ethyl acetate (99:1) to afford **5** as yellow liquid (2.15 g, 66 %). The derivatives **6** and **9** were obtained according to the same procedure as described above.

Spectral Data of **5**: <sup>1</sup>H NMR (400 MHz, acetone, 298 K): δ 7.58 (d, *J* = 8.0 Hz, 1H), 7.35 – 7.21 (m, 3H), 7.06 (d, *J* = 8.0 Hz, 1H), 6.98 (t, *J* = 7.7 Hz, 1H), 6.91 (t, *J* = 7.6 Hz, 1H), 6.81 (dd, *J* = 8.3, 6.8 Hz, 1H), 6.55 (bs, 1H), 3.91 (s, 3H). MS (FAB), *m/z* 277.0 [M<sup>+</sup>].

Spectral Data of **6**: <sup>1</sup>H NMR (400 MHz, CDCl<sub>3</sub>, 298 K): δ 7.30 (d, *J* = 7.9 Hz, 1H), 7.20 (d, *J* = 8.6 Hz, 1H), 7.10 – 7.00 (m, 2H), 6.75 – 6.66 (m, 1H), 6.54 (d, *J* = 2.7 Hz, 1H), 6.46 (dd, *J* = 8.6, 2.7 Hz, 1H), 6.06 (bs, 1H), 3.82 (s, 3H), 3.80 (s, 3H). MS (FAB), *m/z* 263.1 [M<sup>+</sup>].

Spectral Data of **9**: <sup>1</sup>H NMR (400 MHz, CDCl<sub>3</sub>, 298 K): δ 7.12 (d, *J* = 8.7 Hz, 2H), 7.03 (d, *J* = 7.5 Hz, 1H), 6.92 – 6.83 (m, 3H), 6.83 – 6.71 (m, 2H), 5.97 (bs, 1H), 3.90 (s, 3H), 3.80 (s, 3H). MS (FAB), *m/z* 229.1 [M<sup>+</sup>].

Synthesis of **Cz-1**: To a mixture of **5** (1.60 g, 5.75 mmol), potassium carbonate (1.59 g, 11.50 mmol), Pd(OAc)<sub>2</sub> (0.13 g, 0.57 mmol) and P(<sup>t</sup>Bu)<sub>3</sub>·HBF<sub>4</sub> (0.33 g, 1.15 mmol) was added dimethylacetamide (40 mL) and toluene (40 mL) under N<sub>2</sub> atmosphere. The reaction mixture was heated to reflux and being stirred for 24 hours, the mixture was cooled to room temperature and partitioned between water and ethyl acetate. The organic layer was separated and the aqueous layer was extracted with ethyl acetate (2 × 100 mL). The combined organic layers were washed with brine, dried over Na<sub>2</sub>SO<sub>4</sub>, and concentrated to dryness. The resulting residue was purified by silica gel column chromatography, eluting with hexane and ethyl acetate (99:1) to afford **Cz-1** as white powder (0.64 g, 56 %). **Cz-2** was obtained according to the same procedure as described above.

Spectral Data of **Cz-1**:  $^1\text{H}$  NMR (400 MHz, acetone, 298 K):  $\delta$  10.31 (bs, 1H), 8.06 (d,  $J = 7.9$  Hz, 1H), 7.68 (d,  $J = 7.8$  Hz, 1H), 7.56 (d,  $J = 8.2$  Hz, 1H), 7.36 (t,  $J = 7.6$  Hz, 1H), 7.15 (ddd,  $J = 8.0$ , 7.1, 1.0 Hz, 1H), 7.10 (t,  $J = 7.8$  Hz, 1H), 6.95 (d,  $J = 7.8$  Hz, 1H), 3.99 (s, 3H). MS (EI),  $m/z$  197.1 [ $\text{M}^+$ ].

Spectral Data of **Cz-2**:  $^1\text{H}$  NMR (400 MHz,  $\text{CDCl}_3$ , 298 K):  $\delta$  8.09 (bs, 1H), 7.99 (d,  $J = 8.0$  Hz, 1H), 7.46 – 7.32 (m, 2H), 7.18 (t,  $J = 7.4$  Hz, 1H), 7.11 (d,  $J = 2.0$  Hz, 1H), 6.58 (d,  $J = 2.0$  Hz, 1H), 3.97 (s, 3H), 3.92 (s, 3H). MS (EI),  $m/z$  227.1 [ $\text{M}^+$ ].

Synthesis of **Cz-3**: To a mixture of **9** (4.00 g, 17.44 mmol), potassium carbonate (0.24 g, 0.87 mmol), and  $\text{Pd}(\text{OAc})_2$  (0.20 g, 0.89 mmol) was added pivalic acid (50 mL) under open air condition. The reaction mixture was heated to 130 °C and, after stirring overnight, the mixture was cooled to room temperature and partitioned between water and ethyl acetate. The organic layer was separated and the aqueous layer was extracted with ethyl acetate ( $2 \times 100$  mL). The combined organic layers were washed with brine, dried over  $\text{Na}_2\text{SO}_4$ , and concentrated to dryness. The resulting residue was purified by silica gel column chromatography, eluting with hexane and ethyl acetate (4:1) to afford **Cz-3** as light yellow powder (2.60 g, 66 %).

Spectral Data of **Cz-3**:  $^1\text{H}$  NMR (400 MHz,  $\text{CDCl}_3$ , 298 K):  $\delta$  8.10 (bs, 1H), 7.62 (d,  $J = 7.9$  Hz, 1H), 7.51 (d,  $J = 1.5$  Hz, 1H), 7.34 (d,  $J = 8.7$  Hz, 1H), 7.12 (t,  $J = 7.8$  Hz, 1H), 7.05 (d,  $J = 6.3$  Hz, 1H), 6.87 (d,  $J = 7.8$  Hz, 1H), 3.99 (s, 3H), 3.91 (s, 3H). MS (EI),  $m/z$  227.1 [ $\text{M}^+$ ].

Synthesis of **CzBM-1**: To a solution of **Cz-1** (0.50 g, 2.53 mmol) in THF (10 mL) was slowly added 1.1 mL of 2.5 M solution of *n*-BuLi in hexane at  $-78$  °C and stirred for 2 h. After that, dimesitylfluoroborane (1.02 g, 3.8 mmol) in THF (10 mL) was added, and was gradually warmed up to room temperature over 4 h and then heated to reflux for another 12 h. The resulting reaction mixture was quenched with water (20 mL) and extracted with ethyl acetate ( $2 \times 50$  mL). The combined organic layers were washed with brine, dried over  $\text{Na}_2\text{SO}_4$ , and concentrated to dryness. The resulting residue was purified by silica gel column chromatography, eluting with hexane and  $\text{CH}_2\text{Cl}_2$  (10:1) to afford **CzBM-1** as white powder (0.57 g, 51 %). Compounds **CzBM-2** and **CzBM-3** were prepared by following the procedure described for **CzBM-1**.

Spectral Data of **CzBM-1**:  $^1\text{H}$  NMR (400 MHz,  $\text{CDCl}_3$ , 298 K):  $\delta$  7.97 (d,  $J = 7.5$  Hz, 1H), 7.62 (d,  $J = 7.6$  Hz, 1H), 7.23 (dd,  $J = 16.1, 8.5$  Hz, 2H), 7.10 (t,  $J = 7.6$  Hz, 1H), 6.87 (s, 2H), 6.84 (s, 1H),

6.78 (s, 1H), 6.73 (d,  $J = 7.9$  Hz, 1H), 6.51 (s, 1H), 3.27 (s, 3H), 2.36 (s, 3H), 2.35 (s, 3H), 2.22 (s, 3H), 2.16 (s, 3H), 1.92 (s, 3H), 1.27 (s, 3H).  $^{13}\text{C}$  NMR (100 MHz,  $\text{CDCl}_3$ ):  $\delta$  149.40, 141.97, 141.80, 141.29, 139.67, 139.42, 137.96, 133.51, 130.50, 129.00, 128.68, 128.39, 128.04, 127.86, 126.65, 123.32, 121.87, 119.96, 114.52, 111.99, 108.49, 54.58, 23.01, 22.71, 21.82, 21.56, 20.78. MS (FAB):  $m/z$  445.3 [ $\text{M}^+$ ]. Anal. Calcd. for  $\text{C}_{31}\text{H}_{32}\text{N}$ : C, 83.59; H, 7.24; N, 3.14. Found: C, 83.40; H, 7.38; N, 3.05.

Spectral Data of **CzBM-2**:  $^1\text{H}$  NMR (400 MHz,  $\text{CDCl}_3$ , 298 K):  $\delta$  7.93 (d,  $J = 7.8$  Hz, 1H), 7.19 (t,  $J = 7.4$  Hz, 1H), 7.08 (s, 1H), 7.05 (d,  $J = 7.3$  Hz, 1H), 6.88 (s, 2H), 6.80 (d,  $J = 8.5$  Hz, 2H), 6.54 (bs, 1H), 6.36 (s, 1H), 3.89 (s, 3H), 3.24 (s, 3H), 2.35 (s, 3H), 2.31 (bs, 3H), 2.21 (s, 3H), 2.13 (bs, 3H), 1.89 (bs, 3H), 1.27 (bs, 3H).  $^{13}\text{C}$  NMR (100 MHz,  $\text{CDCl}_3$ ):  $\delta$  156.60, 149.69, 143.40, 141.52, 140.97, 139.41, 139.00, 137.53, 130.19, 128.69, 128.34, 128.08, 127.71, 126.35, 121.42, 119.44, 114.39, 98.35, 93.45, 55.76, 54.37, 22.64, 22.33, 21.51, 21.26, 20.52. MS (FAB):  $m/z$  475.3 [ $\text{M}^+$ ]. Anal. Calcd. for  $\text{C}_{32}\text{H}_{34}\text{N}$ : C, 80.84; H, 7.21; N, 2.95. Found: C, 81.03; H, 6.99; N, 3.11.

Spectral Data of **CzBM-3**:  $^1\text{H}$  NMR (400 MHz,  $\text{CDCl}_3$ , 298 K):  $\delta$  7.56 (dd,  $J = 7.7, 0.9$  Hz, 1H), 7.42 (t,  $J = 1.5$  Hz, 1H), 7.19 (t,  $J = 7.8$  Hz, 1H), 6.86 (s, 2H), 6.77 (s, 1H), 6.71 (t,  $J = 3.3$  Hz, 3H), 6.51 (s, 1H), 3.87 (s, 3H), 3.25 (s, 3H), 2.35 (s, 3H), 2.33 (s, 3H), 2.21 (s, 3H), 2.15 (s, 3H), 1.91 (s, 3H), 1.29 (s, 3H).  $^{13}\text{C}$  NMR (100 MHz,  $\text{CDCl}_3$ ):  $\delta$  155.28, 149.51, 141.85, 141.28, 139.65, 139.31, 137.83, 137.77, 134.14, 130.50, 129.01, 128.99, 128.99, 128.65, 128.35, 128.00, 123.15, 115.37, 114.84, 111.91, 108.51, 102.98, 56.01, 54.54, 22.97, 22.62, 21.80, 21.56, 20.80. MS (FAB):  $m/z$  475.3 [ $\text{M}^+$ ]. Anal. Calcd. for  $\text{C}_{32}\text{H}_{34}\text{N}$ : C, 80.84; H, 7.21; N, 2.95. Found: C, 81.04; H, 7.08; N, 3.00.

Synthesis of **13**: A flask containing Cz-2 (1.00 g, 4.40 mmol), 1-bromo-4-iodobenzene (2.49 g, 8.80 mmol), potassium carbonate (1.82 g, 13.20 mmol) and copper powder (0.84 g, 13.20 mmol) was evacuated and backfilled with nitrogen. Degassed DMF was added and the reaction mixture was heated to reflux and continued to stir for 12 h. It was next cooled to RT, filtered via Celite, washed with ethyl acetate and partitioned between water and ethyl acetate. The organic layer was separated and the aqueous layer was extracted with ethyl acetate ( $2 \times 100$  mL). The combined organic layers were washed with brine, dried over  $\text{Na}_2\text{SO}_4$ , and concentrated to dryness. The resulting residue was purified by silica gel column chromatography, eluting with hexane and ethyl acetate (10:0.2) to afford **13** as

white powder (1.39 g, 83 %). Compound **14** was prepared by following the procedure described for **13**.

Spectral Data of **13**:  $^1\text{H NMR}$  (400 MHz,  $\text{CDCl}_3$ , 298 K):  $\delta$  7.69 (d,  $J = 7.8$  Hz, 1H), 7.58 (d,  $J = 8.7$  Hz, 2H), 7.53 (d,  $J = 2.4$  Hz, 1H), 7.29 (d,  $J = 8.7$  Hz, 2H), 7.17 (t,  $J = 7.8$  Hz, 2H), 7.10 (d,  $J = 8.9$  Hz, 1H), 6.99 (dd,  $J = 8.9, 2.5$  Hz, 1H), 6.88 (d,  $J = 7.9$  Hz, 1H), 3.91 (s, 3H), 3.68 (s, 3H). MS(EI),  $m/z$  381.1 [ $\text{M}^+$ ].

Spectral Data of **14**:  $^1\text{H NMR}$  (400 MHz,  $\text{CDCl}_3$ , 298 K):  $\delta$  8.03 (d,  $J = 7.8$  Hz, 1H), 7.59 (d,  $J = 8.5$  Hz, 2H), 7.38 – 7.31 (m, 2H), 7.29 (d,  $J = 8.4$  Hz, 2H), 7.22 (d,  $J = 6.3$  Hz, 1H), 7.18 (d,  $J = 2.2$  Hz, 1H), 6.57 (d,  $J = 2.1$  Hz, 1H), 3.94 (s, 3H), 3.67 (s, 3H). MS (EI),  $m/z$  381.1 [ $\text{M}^+$ ].

Synthesis of **CzPBM-2**: To a solution of **13** (1.00 g, 2.62 mmol) in THF (30 mL) was slowly added 1.15 mL of 2.5 M solution of *n*-BuLi in hexane at  $-78$  °C and stirred for 2 h. After that, dimesitylfluoroborane (1.05 g, 3.92 mmol) in THF (10 mL) was added, and was gradually warmed up to room temperature and stirred for 12 h. The resulting reaction mixture was quenched with water (20 mL) and extracted with ethyl acetate ( $2 \times 50$  mL). The combined organic layers were washed with brine, dried over  $\text{Na}_2\text{SO}_4$ , and concentrated to dryness. The resulting residue was purified by silica gel column chromatography, eluting with hexane and  $\text{CH}_2\text{Cl}_2$  (10:1) to afford **CzPBM-2** as light yellow powder (0.69 g, 48 %). Compound **CzPBM-3** was prepared by following the procedure described for **CzPBM-2**.

Spectral Data of **CzPBM-2**:  $^1\text{H NMR}$  (400 MHz,  $\text{CDCl}_3$ , 298 K):  $\delta$  8.05 (d,  $J = 7.8$  Hz, 1H), 7.63 (d,  $J = 7.8$  Hz, 2H), 7.40 (d,  $J = 7.8$  Hz, 2H), 7.36 (d,  $J = 7.1$  Hz, 1H), 7.30 (d,  $J = 7.8$  Hz, 1H), 7.23 (d,  $J = 7.0$  Hz, 1H), 7.20 (d,  $J = 2.1$  Hz, 1H), 6.87 (s, 4H), 6.59 (d,  $J = 2.0$  Hz, 1H), 3.96 (s, 3H), 3.64 (s, 3H), 2.34 (s, 6H), 2.11 (s, 12H).  $^{13}\text{C NMR}$  (100 MHz,  $\text{CDCl}_3$ ):  $\delta$  155.06, 147.52, 142.69, 142.02, 140.96, 138.90, 136.51, 128.41, 127.62, 126.00, 125.44, 125.32, 123.85, 120.27, 119.83, 110.40, 99.12, 94.48, 56.30, 55.73, 23.86, 21.66. MS (FAB):  $m/z$  551.3 [ $\text{M}^+$ ]. Anal. Calcd.  $\text{C}_{38}\text{H}_{38}\text{N}$ : C, 82.75; H, 6.94; N, 2.54. Found: C, 82.63; H, 6.83; N, 2.71.

Spectral Data of **CzPBM-3**:  $^1\text{H NMR}$  (400 MHz,  $\text{CDCl}_3$ , 298 K):  $\delta$  7.69 (d,  $J = 7.8$  Hz, 1H), 7.61 (d,  $J = 8.3$  Hz, 2H), 7.54 (d,  $J = 2.5$  Hz, 1H), 7.38 (d,  $J = 8.3$  Hz, 2H), 7.20 – 7.14 (m, 2H), 7.01 (dd,  $J = 8.9, 2.5$  Hz, 1H), 6.88 (d,  $J = 7.9$  Hz, 1H), 6.84 (s, 4H), 3.92 (s, 3H), 3.62 (s, 3H), 2.31 (s, 6H), 2.08 (s, 12H).  $^{13}\text{C NMR}$  (100 MHz,  $\text{CDCl}_3$ ):  $\delta$  154.44, 147.06, 142.93, 141.87, 140.96, 138.91, 136.81,



136.48, 130.67, 128.42, 127.69, 125.67, 124.13, 120.23, 115.36, 113.15, 111.15, 108.37, 103.06, 56.42, 55.83, 23.87, 21.67. MS (FAB):  $m/z$  551.3  $[M^+]$ . Anal. Calcd. for  $C_{38}H_{38}N$ : C, 82.75; H, 6.94; N, 2.54. Found: C, 82.66; H, 7.07; N, 2.58.

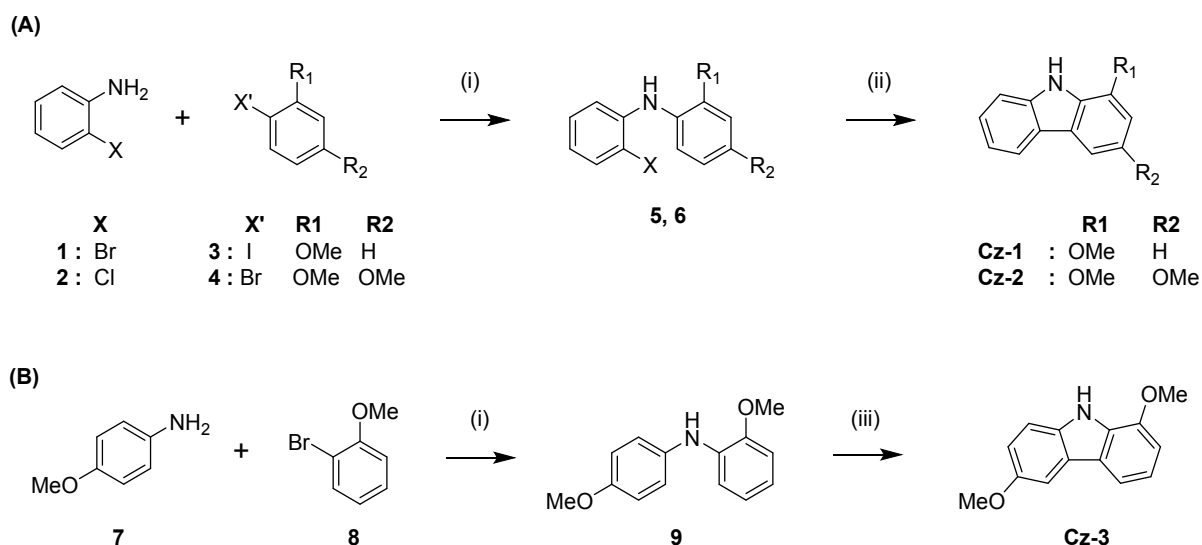

**Scheme S1.** Synthetic routes of (A) Cz-1 and Cz-2 and (B) Cz-3. Experimental conditions: (i)  $t\text{BuONa}$ ,  $\text{Pd}_2\text{dba}_3$ ,  $\text{dppf}$ , toluene, reflux, 24 h. (ii)  $\text{K}_2\text{CO}_3$ ,  $\text{Pd}(\text{OAc})_2$ ,  $\text{P}(t\text{Bu})_3$ , toluene/DMAc, reflux, 24 h. (iii) pivalic acid,  $\text{K}_2\text{CO}_3$ ,  $110\text{ }^\circ\text{C}$ , 12 h.

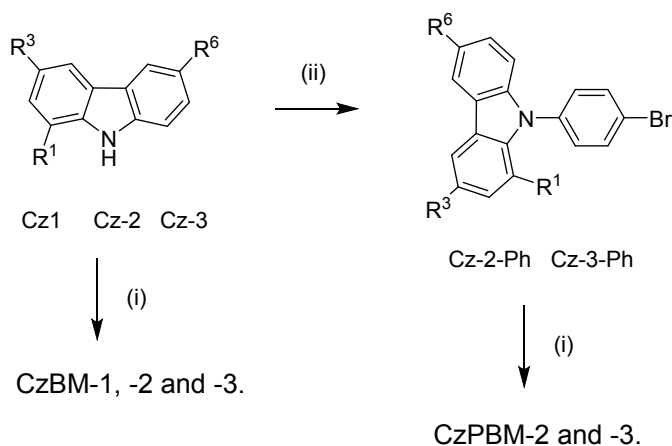

**Scheme S2.** Synthetic routes of **CzBM-1, 2 and 3** and **CzPBM-2 and 3**. Experimental conditions: (i) a)  $n\text{-BuLi}$ , THF,  $-78\text{ }^\circ\text{C}$ , 1 h. b)  $(\text{Mes})_2\text{BF}$ , warm to RT, reflux 12 h; (ii) 1-bromo-4-iodobenzene, Cu powder,  $\text{K}_2\text{CO}_3$ , DMF, Reflux, 24 h.

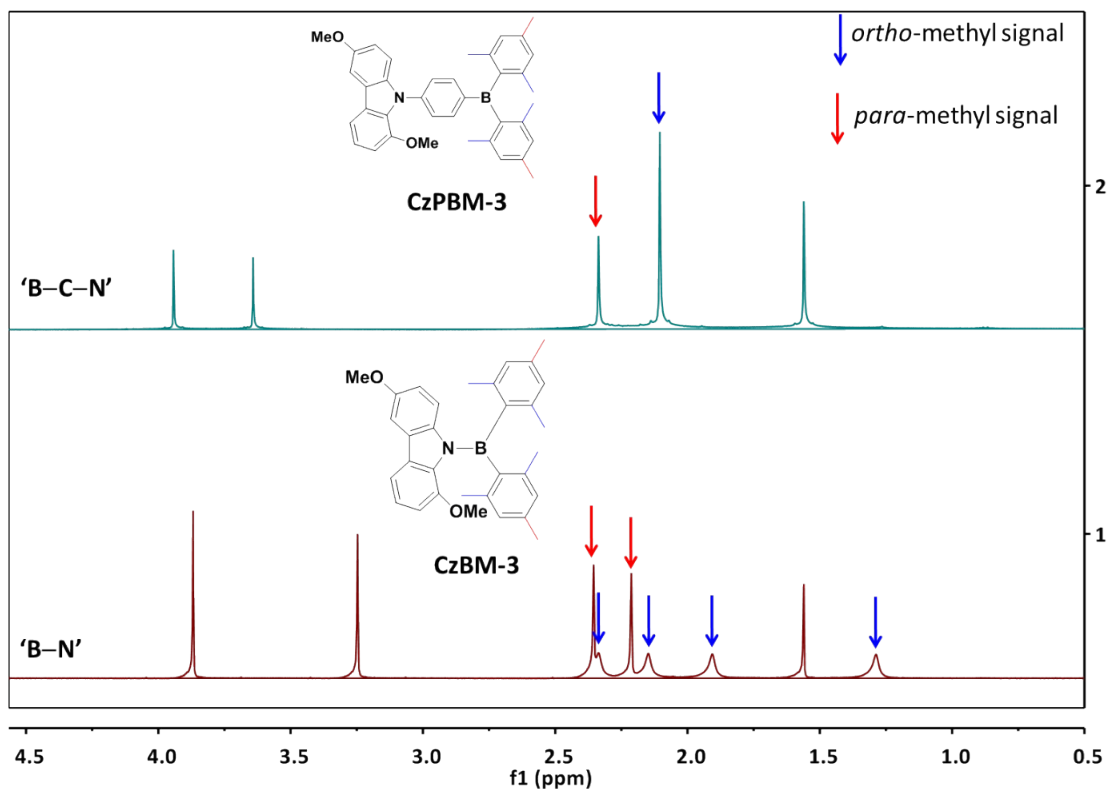

**Figure S1.** <sup>1</sup>H NMR spectra displaying the '*ortho*' and '*para*' – methyl proton signals of mesityl unit in CzBM-3, and CzPBM-3. This '*ortho*' and '*para*' methyl proton signals is marked with blue and red colored downward arrow symbols respectively. The distinct pattern of these methyl protons between the B-N and B-C<sub>6</sub>H<sub>4</sub>-N compounds is due to the restricted rotation of the mesityl unit in the former type compounds.

### 3. Thermogravimetric analysis (TGA) Methods:

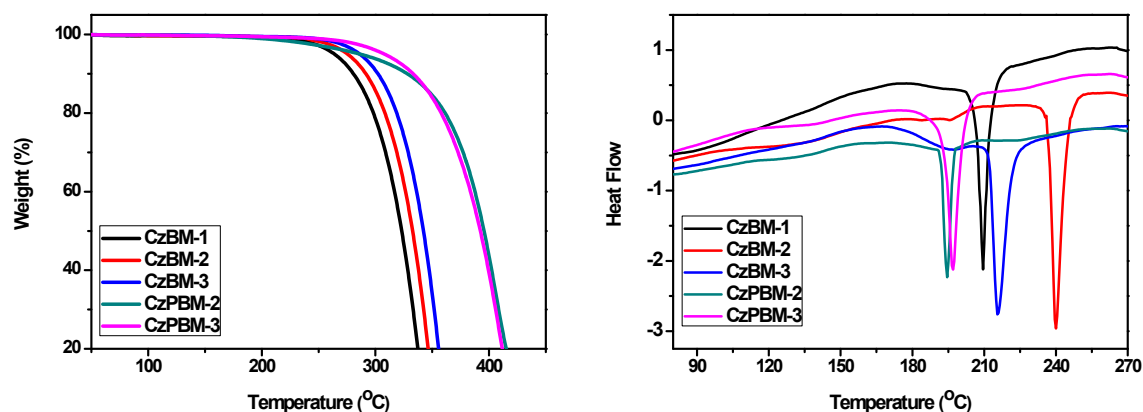

**Figure S2.** TGA (left) and DSC (right) data of CzBM-1 to 3, CPBM-2 and 3. The samples were heated under a nitrogen atmosphere at a heating rate of 10 °C/min

**Table S1.** Thermal analysis of CzBM-1 to 3, CPBM-2 and 3.<sup>[a]</sup>

|                           | CzBM-1 | CzBM-2 | CzBM-3 | CzPBM-2 | CzPBM-3 |
|---------------------------|--------|--------|--------|---------|---------|
| $T_d$ (°C) <sup>[b]</sup> | 264    | 276    | 286    | 287     | 308     |
| $T_g$ (°C)                | 192    | 196    | 195    | 136     | 141     |
| $T_m$ (°C)                | 210    | 240    | 216    | 195     | 197     |

<sup>[a]</sup>  $T_d$ ,  $T_g$ , and  $T_m$  represent the decomposition temperatures, glass transition, and melting temperatures respectively. <sup>[b]</sup> Temperature at 5% weight loss to initial weight.

#### 4. Photophysical properties:

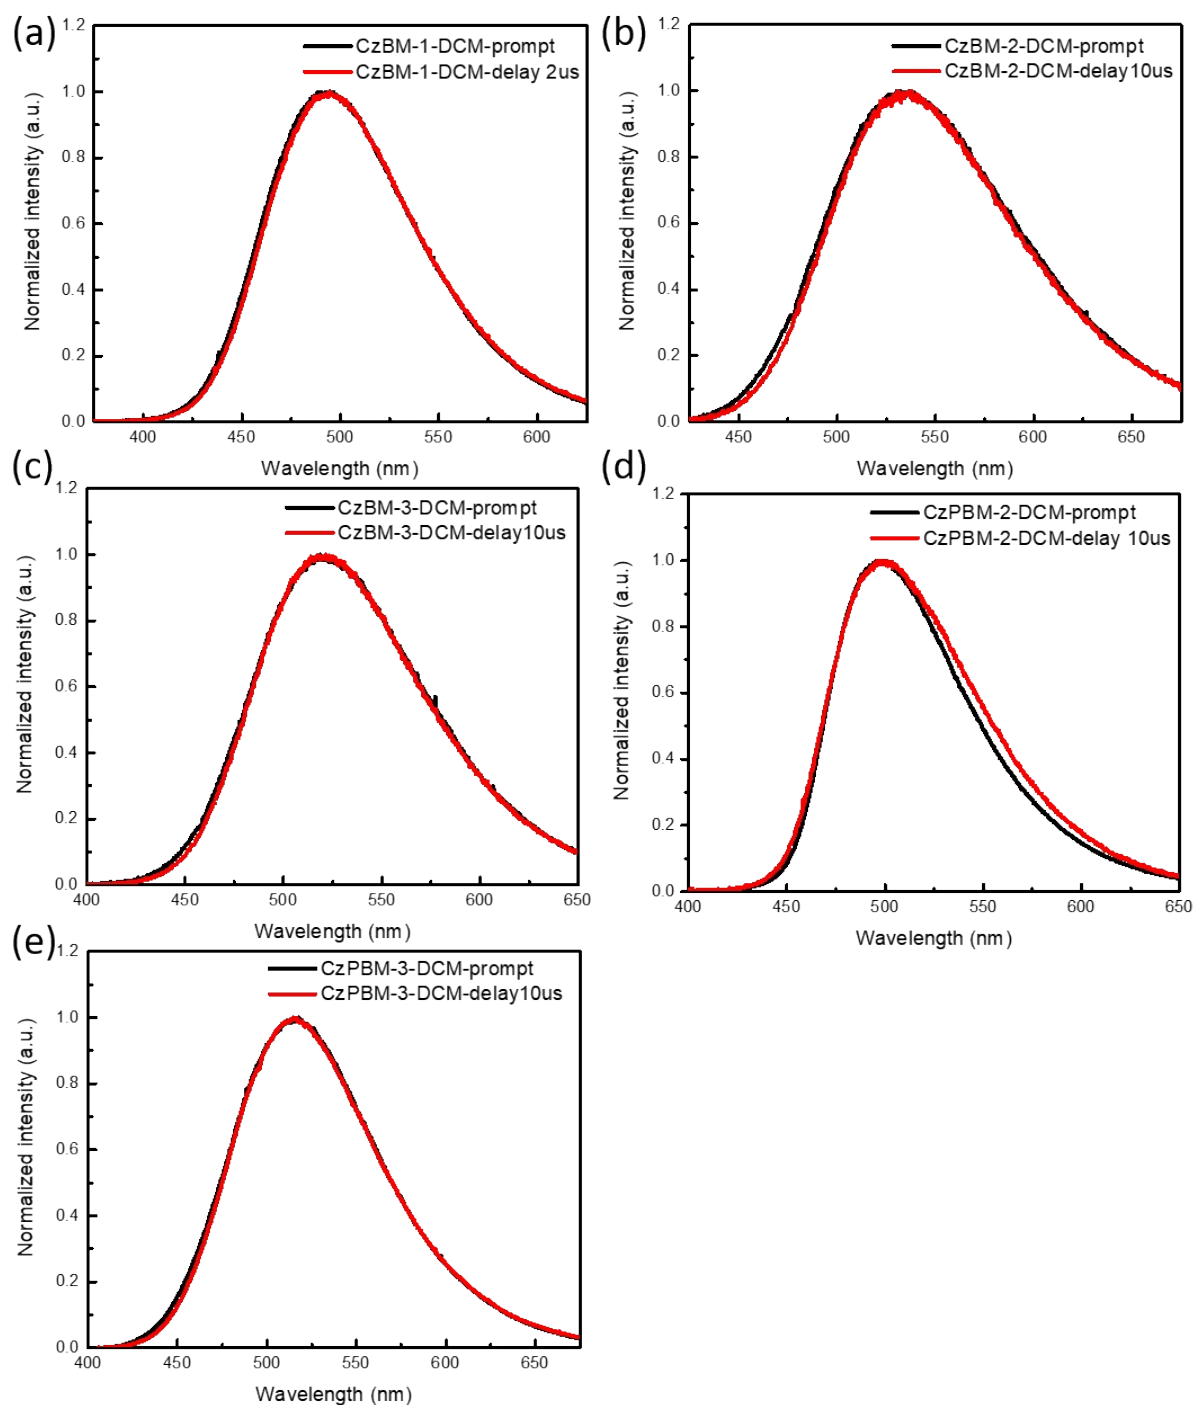

**Figure S3.** The time resolved PL spectra of the titled molecules in  $\text{CH}_2\text{Cl}_2$  solution, (a) **CzBM-1**, (b) **CzBM-2**, (c) **CzBM-3**, (d) **CzPBM-2** and (e) **CzPBM-3**. Prompt (black line: delay = 0 ns, gate width = 50 ns) and delayed (red line: delay time as described in the figure, gate width = 10  $\mu\text{s}$ ) components of PL spectra.

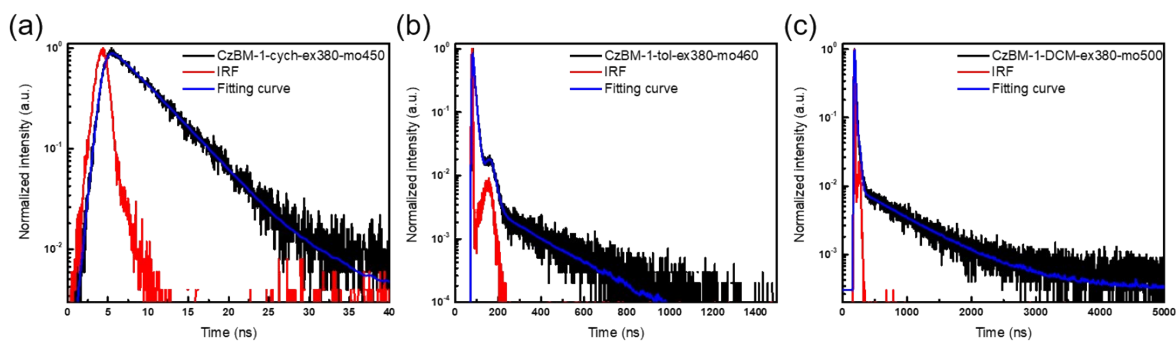

**Figure S4.** Transient photoluminescence characteristics of the **CzBM-1** in  $\text{CH}_2\text{Cl}_2$  solutions. Notes that the excitation and monitored wavelengths are described in the figure. IRF represents the instrument response function (red).

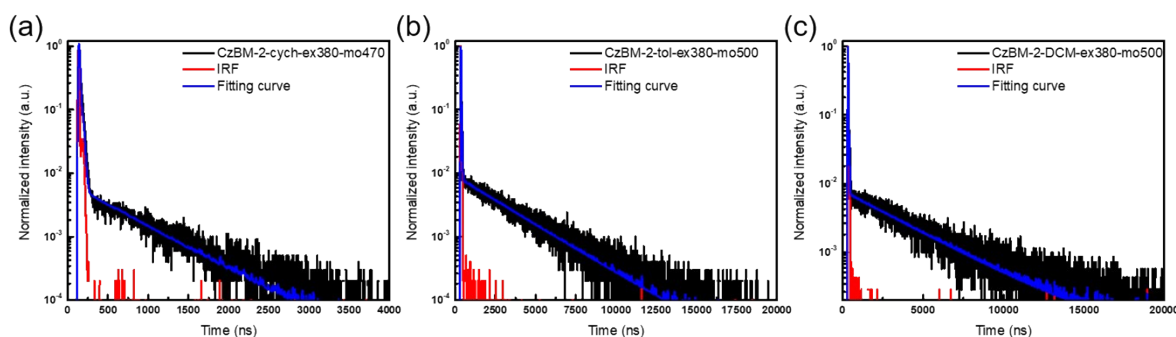

**Figure S5.** Transient photoluminescence characteristics of the **CzBM-2** in  $\text{CH}_2\text{Cl}_2$  solutions. Notes that the excitation and monitored wavelengths are described in the figure. IRF represents the instrument response function (red).

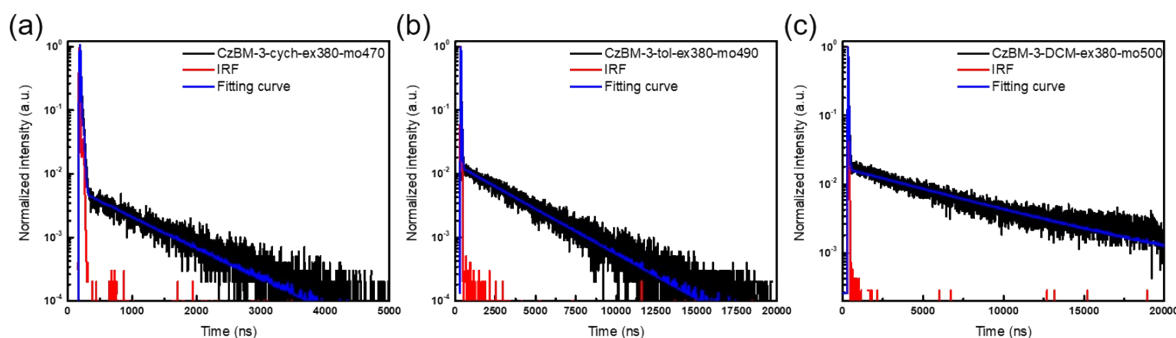

**Figure S6.** Transient photoluminescence characteristics of **CzBM-3** in  $\text{CH}_2\text{Cl}_2$  solutions. Notes that the excitation and monitored wavelengths are described in the figure. IRF represents the instrument response function (red).

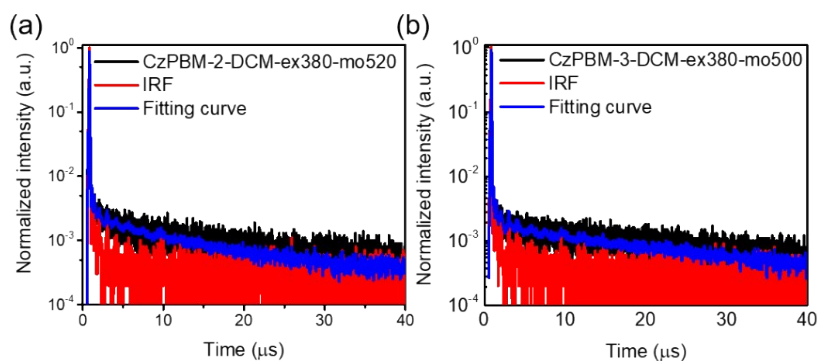

**Figure S7.** Transient photoluminescence characteristics of **CzPBM-2** and **3** in  $\text{CH}_2\text{Cl}_2$  solutions. Notes that the excitation and monitored wavelengths are described in the figure. IRF represents the instrument response function (red).

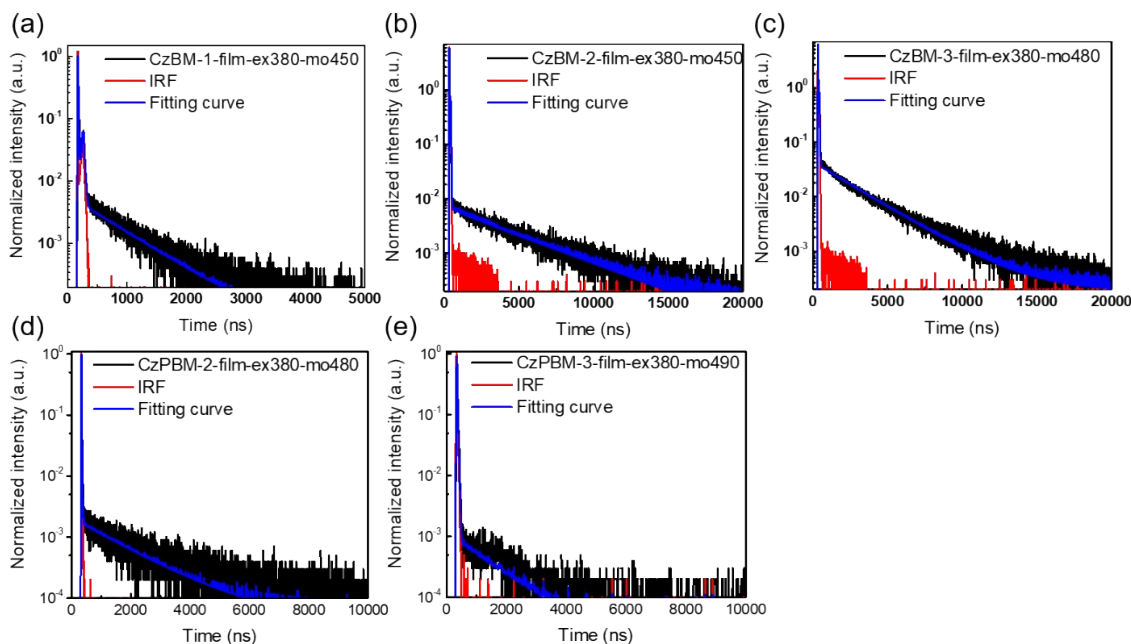

**Figure S8.** Transient photoluminescence characteristics of the titled molecules in neat film. Notes that the monitored wavelengths are described in the figure. IRF represents the instrument response function (red).

**Table S2.** Photophysical properties of the studied boron compounds under various states at room temperature and the calculated  $K_{isc}$  and  $K_{risc}$ .

|                | state                           | $\lambda_{em}$<br>[nm] | $\tau_{1,2}$ [ns] and<br>pre-exp. factor $A_{1,2}$ | $K_{isc}$ (s <sup>-1</sup> ) <sup>a</sup> | $K_{risc}$ (s <sup>-1</sup> ) <sup>a</sup> |
|----------------|---------------------------------|------------------------|----------------------------------------------------|-------------------------------------------|--------------------------------------------|
| <b>CzBM-1</b>  | cyclohexane                     | 440                    | 4.19 (1)                                           | -                                         | -                                          |
|                | toluene                         | 462                    | 9.8 (0.996), 212(0.004)                            | $2.38 \times 10^8$                        | $9.55 \times 10^5$                         |
|                | CH <sub>2</sub> Cl <sub>2</sub> | 480                    | 14.57 (0.998), 764 (0.002)                         | $1.02 \times 10^8$                        | $2.04 \times 10^5$                         |
|                | Neat film                       | 442                    | 5.97 (0.999), 721.4 (0.001)                        | $6.86 \times 10^7$                        | $6.86 \times 10^4$                         |
| <b>CzBM-2</b>  | cyclohexane                     | 475                    | 10.98 (0.997), 629(0.003)                          | $9.08 \times 10^7$                        | $2.73 \times 10^5$                         |
|                | toluene                         | 501                    | 15.29 (0.992), 2840 (0.008)                        | $6.49 \times 10^7$                        | $5.23 \times 10^5$                         |
|                | CH <sub>2</sub> Cl <sub>2</sub> | 524                    | 11.53 (0.998), 3520 (0.002)                        | $8.66 \times 10^7$                        | $1.73 \times 10^5$                         |
|                | Neat film                       | 481                    | 1.13 (0.997), 4259 (0.003)                         | $8.82 \times 10^8$                        | $2.65 \times 10^6$                         |
|                | DPEPO doped film                | 478                    | 4.94 (0.999), 26633 (0.001)                        | $2.02 \times 10^8$                        | $2.02 \times 10^5$                         |
| <b>CzBM-3</b>  | cyclohexane                     | 467                    | 9.98 (0.997), 868 (0.003)                          | $9.99 \times 10^7$                        | $3.01 \times 10^5$                         |
|                | toluene                         | 492                    | 15.48 (0.997), 3087 (0.003)                        | $6.44 \times 10^7$                        | $1.94 \times 10^5$                         |
|                | CH <sub>2</sub> Cl <sub>2</sub> | 510                    | 20.77 (0.997), 6955 (0.003)                        | $4.80 \times 10^7$                        | $1.44 \times 10^5$                         |
|                | Neat film                       | 479                    | 3.58 (0.992), 2657 (0.008)                         | $2.77 \times 10^8$                        | $2.23 \times 10^6$                         |
|                | DPEPO doped film                | 476                    | 8.47 (0.999), 5578 (0.001)                         | $1.18 \times 10^8$                        | $1.18 \times 10^5$                         |
| <b>CzPBM-2</b> | cyclohexane                     | 417                    | 6.42 (1)                                           | -                                         | -                                          |
|                | toluene                         | 464                    | 16.40 (0.998), 10000 (0.002)                       | $6.09 \times 10^7$                        | $1.22 \times 10^5$                         |
|                | CH <sub>2</sub> Cl <sub>2</sub> | 519                    | 18.42 (0.998), 10008 (0.002)                       | $5.42 \times 10^7$                        | $1.09 \times 10^5$                         |
|                | Neat film                       | 475                    | 12.31 (0.999), 1609 (0.001)                        | $8.12 \times 10^7$                        | $8.12 \times 10^4$                         |
|                | DPEPO doped film                | 474                    | 18.11 (0.999), 2218 (0.001)                        | $5.52 \times 10^7$                        | $5.52 \times 10^4$                         |
| <b>CzPBM-3</b> | cyclohexane                     | 406                    | 5.65 (0.999), 10000 (0.001)                        | $1.77 \times 10^8$                        | $1.77 \times 10^5$                         |
|                | toluene                         | 452                    | 12.59 (0.999), 5582 (0.001)                        | $7.93 \times 10^7$                        | $7.94 \times 10^4$                         |
|                | CH <sub>2</sub> Cl <sub>2</sub> | 499                    | 21.81 (0.998), 19277 (0.002)                       | $4.58 \times 10^7$                        | $9.17 \times 10^4$                         |
|                | Neat film                       | 463                    | 12.49 (0.997), 1251 (0.003)                        | $7.98 \times 10^7$                        | $7.98 \times 10^7$                         |
|                | DPEPO doped film                | 458                    | 31.00 (0.997), 9880 (0.003)                        | $3.22 \times 10^7$                        | $9.68 \times 10^4$                         |

<sup>a</sup>Notes that the  $K_{isc}$  and  $K_{risc}$  are calculated from the kinetic factor of  $\tau_1$  and  $\tau_2$  in the transient PL decay and the equation are shown below. The subscripts p and d indicates prompt and delay transient signals, respectively. The transient photoluminescence figures were fitted and analyzed by the following equation:

$$I(t) = A_1 \exp\left(-\frac{t}{\tau_1}\right) + A_2 \exp\left(-\frac{t}{\tau_2}\right) \quad (1)$$

$$K_p = (\tau_1)^{-1}, \quad K_d = (\tau_2)^{-1} \quad (2)$$

$$K_{eq} = \frac{K_{isc}}{K_{risc}} = \frac{K_{fast}}{K_{slow}} = \frac{A_1}{A_2} \quad (3)$$



---

$$K_{isc} + K_{risc} = (\tau_1)^{-1} \quad (4)$$

$$\Delta E_{TS} = -RT \ln (K_{eq}/3) \quad (5)$$

### 5. Cyclic Voltammograms studies:

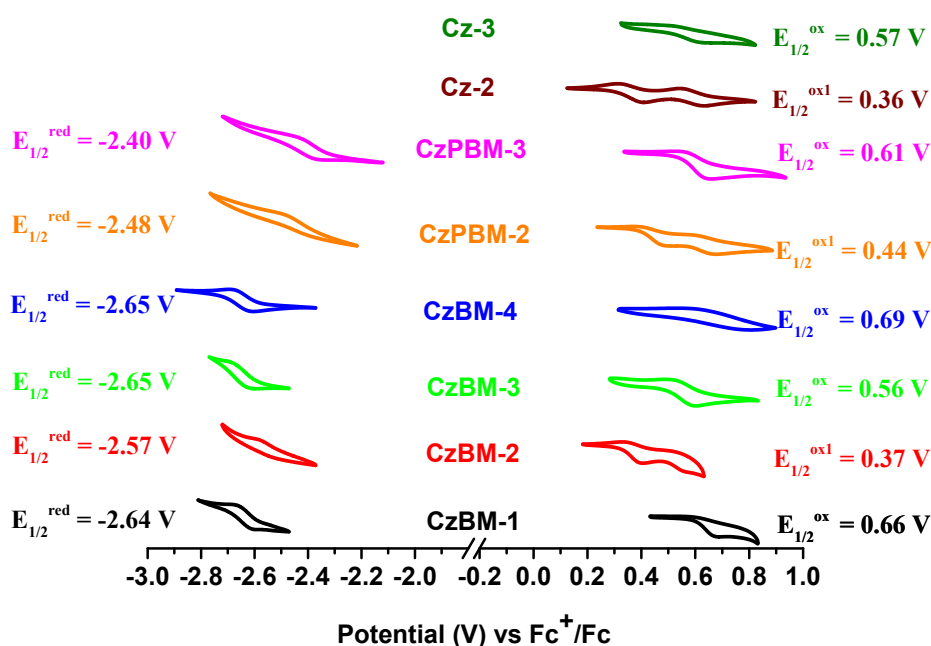

**Figure S9.** Cyclic

voltammograms of Cz-2 and Cz-3, CzBM-1 to 3, and CPBM-2 and 3. The oxidation and reduction experiments were conducted in acetonitrile solution. The platinum and gold were selected as the working electrode for oxidation and reduction processes, respectively.

**Table S3.** Electrochemical properties and calculated bandgaps of parent carbazoles Cz-2 and Cz-3 and corresponding TADF molecules.

| SAMPLE CODE    | $E_{1/2}^{\text{ox}}$ (V) <sup>a</sup> | $E_{1/2}^{\text{red}}$ (V) <sup>a</sup> | HOMO (eV) CV <sup>b</sup> | LUMO (eV) CV <sup>b</sup> |
|----------------|----------------------------------------|-----------------------------------------|---------------------------|---------------------------|
| <b>Cz-2</b>    | 0.36                                   | -                                       | -5.16                     | -                         |
| <b>Cz-3</b>    | 0.57                                   | -                                       | -5.37                     | -                         |
| <b>CzBM-1</b>  | 0.66                                   | -2.64                                   | -5.46                     | -2.16                     |
| <b>CzBM-2</b>  | 0.37                                   | -2.57                                   | -5.17                     | -2.23                     |
| <b>CzBM-3</b>  | 0.56                                   | -2.65                                   | -5.36                     | -2.15                     |
| <b>CzPBM-2</b> | 0.44                                   | -2.48                                   | -5.24                     | -2.32                     |
| <b>CzPBM-3</b> | 0.61                                   | -2.40                                   | -5.41                     | -2.40                     |

<sup>a</sup>  $E_{1/2}^{\text{ox}}$  and  $E_{\text{pc}}^{\text{re}}$  are the anodic and cathodic peak potentials referenced to the  $\text{Fc}^+/\text{Fc}$  couple. <sup>b</sup> HOMO =  $|-4.8 - E_{1/2}^{\text{ox}}|$ , LUMO =  $|-4.8 - E_{\text{pc}}^{\text{re}}|$ .

6. Computational approaches:

**Table S4.** Calculated wavelength ( $\lambda$ ), oscillator strength ( $f$ ) and orbital transition analyses for **CzBM-1** in ground state (R) optimized structure.

| Name          | $\lambda_{\text{cal}}$ | $f$    | assignments          |
|---------------|------------------------|--------|----------------------|
| <b>CzBM-1</b> | 316.16                 | 0.2193 | HOMO-1→LUMO (2.23%)  |
|               |                        |        | HOMO→LUMO (87.17%)   |
|               | 280.89                 | 0.1997 | HOMO-4→LUMO (5.81%)  |
|               |                        |        | HOMO-3→LUMO (2.70%)  |
|               |                        |        | HOMO-2→LUMO (77.79%) |
|               |                        |        | HOMO-1→LUMO (2.67%)  |
|               |                        |        | HOMO→LUMO+1 (4.11%)  |
|               | 279.58                 | 0.0707 | HOMO-2→LUMO (4.05%)  |
|               |                        |        | HOMO-1→LUMO (2.75%)  |
|               |                        |        | HOMO-1→LUMO (2.27%)  |
|               |                        |        | HOMO-1→LUMO (3.25%)  |
|               |                        |        | HOMO→LUMO+1 (79.08%) |

**Table S5.** Calculated wavelength ( $\lambda$ ), oscillator strength ( $f$ ) and orbital transition analyses for **CzBM-1** in excited state optimized structure.

| Name          | $\lambda_{\text{cal}}$ | $f$    | assignments        |
|---------------|------------------------|--------|--------------------|
| <b>CzBM-1</b> | 372.96                 | 0.0576 | LUMO→HOMO (92.00%) |

**Table S6.** Calculated wavelength ( $\lambda$ ), oscillator strength ( $f$ ) and orbital transition analyses for **CzBM-2** in ground state (R) optimized structure.

| Name          | $\lambda_{\text{cal}}$ | $f$                | assignments        |
|---------------|------------------------|--------------------|--------------------|
| <b>CzBM-2</b> | 310.68                 | 0.2798             | HOMO→LUMO 87.01%   |
|               | 270.56                 | 0.0423             | HOMO→LUMO+1 87.01% |
|               | 270.56                 | 0.2092             | HOMO-4→LUMO 3.12%  |
|               |                        |                    | HOMO-3→LUMO 8.24%  |
|               |                        |                    | HOMO-2→LUMO 64.19% |
|               |                        | HOMO-1→LUMO 15.57% |                    |

**Table S7.** Calculated wavelength ( $\lambda$ ), oscillator strength ( $f$ ) and orbital transition analyses for **CzBM-2** in excited state optimized structure.

| Name          | $\lambda_{\text{cal}}$ | $f$    | assignments        |
|---------------|------------------------|--------|--------------------|
| <b>CzBM-2</b> | 439.93                 | 0.0478 | LUMO→HOMO (94.23%) |

**Table S8.** Calculated wavelength ( $\lambda$ ), oscillator strength ( $f$ ) and orbital transition analyses for **CzBM-3** in ground state (R) optimized structure.

| Name          | $\lambda_{\text{cal}}$ | $f$    | assignments |        |
|---------------|------------------------|--------|-------------|--------|
| <b>CzBM-3</b> | 311.79                 | 0.2426 | HOMO-1→LUMO | 4.11%  |
|               |                        |        | HOMO→LUMO   | 86.14% |
|               | 287.77                 | 0.062  | HOMO→LUMO+1 | 88.32% |
|               | 270.39                 | 0.1909 | HOMO-4→LUMO | 9.45%  |
| HOMO-2→LUMO   |                        |        | 4.11%       |        |

**Table S9.** Calculated wavelength ( $\lambda$ ), oscillator strength ( $f$ ) and orbital transition analyses for **CzBM-3** in excited state optimized structure.

| Name          | $\lambda_{\text{cal}}$ | $f$    | assignments |          |
|---------------|------------------------|--------|-------------|----------|
| <b>CzBM-3</b> | 434.25                 | 0.0339 | LUMO→HOMO   | (93.40%) |

**Table S10.** Calculated wavelength ( $\lambda$ ), oscillator strength ( $f$ ) and orbital transition analyses for **CzPBM-0** in ground state optimized structure.

| Name           | $\lambda_{\text{cal}}$ | $f$    | assignments  |          |
|----------------|------------------------|--------|--------------|----------|
| <b>CzPBM-0</b> | 323.11                 | 0.5565 | HOMO-7→LUMO  | (3.18%)  |
|                |                        |        | HOMO-3→LUMO  | (11.83%) |
|                |                        |        | HOMO→LUMO    | (76.16%) |
|                |                        |        | HOMO→LUMO+1  | (2.36%)  |
|                | 310.19                 | 0.1473 | HOMO-11→LUMO | (3.30%)  |
|                |                        |        | HOMO-2→LUMO  | (90.89%) |
|                | 287.60                 | 0.0004 | HOMO-10→LUMO | (2.87%)  |
|                |                        |        | HOMO-3→LUMO  | (77.70%) |
| HOMO→LUMO      |                        |        | (11.05%)     |          |

**Table S11.** Calculated wavelength ( $\lambda$ ), oscillator strength ( $f$ ) and orbital transition analyses for **CzPBM-2** in ground state optimized structure.

| Name           | $\lambda_{\text{cal}}$ | $f$    | assignments           |
|----------------|------------------------|--------|-----------------------|
| <b>CzPBM-2</b> | 331.73                 | 0.4684 | HOMO-3→LUMO (7.30%)   |
|                |                        |        | HOMO→LUMO (79.29%)    |
|                |                        |        | HOMO-4→LUMO+1 (2.07%) |
|                | 308.43                 | 0.1545 | HOMO-11→LUMO (3.50%)  |
|                |                        |        | HOMO-2→LUMO (90.72%)  |
|                | 299.31                 | 0.0615 | HOMO→LUMO+1 (88.34%)  |
|                | 289.52                 | 0.0405 | HOMO-10→LUMO (3.59%)  |
|                |                        |        | HOMO-3→LUMO (80.19%)  |
|                |                        |        | HOMO→LUMO (7.35%)     |
|                | 274.66                 | 0.0294 | HOMO-5→LUMO (4.00%)   |
|                |                        |        | HOMO-4→LUMO (81.32%)  |
|                | 273.65                 | 0.0396 | HOMO-5→LUMO (80.62%)  |
|                |                        |        | HOMO-4→LUMO+1 (3.97%) |

**Table S12** Calculated wavelength ( $\lambda$ ), oscillator strength ( $f$ ) and orbital transition analyses for **CzPBM-2** in excited state optimized structure.

| Name           | $\lambda_{\text{cal}}$ | $f$    | assignments        |
|----------------|------------------------|--------|--------------------|
| <b>CzPBM-2</b> | 380.85                 | 0.4084 | LUMO→HOMO (88.65%) |

**Table S13.** Calculated wavelength ( $\lambda$ ), oscillator strength ( $f$ ) and orbital transition analyses for CzPBM-3 in ground state optimized structure.

| Name                  | $\lambda_{\text{cal}}$ | $f$    | assignments            |
|-----------------------|------------------------|--------|------------------------|
| CzPBM-3               | 331.66                 | 0.4767 | HOMO-3→LUMO (6.70%)    |
|                       |                        |        | HOMO-1→LUMO (2.28%)    |
|                       |                        |        | HOMO→LUMO (78.17%)     |
|                       | 308.26                 | 0.1532 | HOMO-2→LUMO (90.17%)   |
|                       | 299.95                 | 0.0761 | HOMO-1→LUMO+1 (88.12%) |
|                       | 289.84                 | 0.0413 | HOMO-3→LUMO (77.72%)   |
|                       |                        |        | HOMO-1→LUMO (2.22%)    |
|                       |                        |        | HOMO→LUMO (8.27%)      |
|                       | 274.68                 | 0.0335 | HOMO-6→LUMO (10.69%)   |
|                       |                        |        | HOMO-5→LUMO+1 (71.41%) |
| HOMO-4→LUMO+1 (2.92%) |                        |        |                        |

**Table S14.** Calculated wavelength ( $\lambda$ ), oscillator strength ( $f$ ) and orbital transition analyses for CzPBM-3 in excited state optimized structure.

| Name    | $\lambda_{\text{cal}}$ | $f$    | assignments        |
|---------|------------------------|--------|--------------------|
| CzPBM-3 | 369.56                 | 0.5110 | LUMO→HOMO (86.10%) |

**Table S15.** Calculated orbital energy levels<sup>a</sup> for the titled molecules.<sup>a</sup>

| Name    | HOMO-3 | HOMO-2 | HOMO-1 | HOMO   | LUMO <sup>b</sup> |
|---------|--------|--------|--------|--------|-------------------|
| CzBM-1  | -7.760 | -7.629 | -7.323 | -6.945 | -3.024            |
| CzBM-2  | -7.762 | -7.638 | -7.262 | -6.797 | -2.807            |
| CzBM-3  | -7.760 | -7.627 | -7.333 | -6.786 | -2.810            |
| CzPBM-0 | -7.759 | -7.661 | -7.350 | -6.873 | -3.036            |
| CzPBM-2 | -7.710 | -7.618 | -7.218 | -6.479 | -2.742            |
| CzPBM-3 | -7.712 | -7.612 | -7.238 | -6.489 | -2.751            |

<sup>a</sup> Notes that the energy levels were recorded in an unit of eV. <sup>b</sup> Notes that the LUMO were calculated from the lowest lying absorption energy gap added the corresponding HOMO level.
